# Supplementary material for: Sexual Dimorphism of the Gut Microbiota in the Chinese Alligator and Its Convergence in the Wild Environment
Source: MDPI journal article supplement (doi:10.3390/ijms232012140), 2022-10-12
Supplement: s1 [file s1]

Supplementary Figures

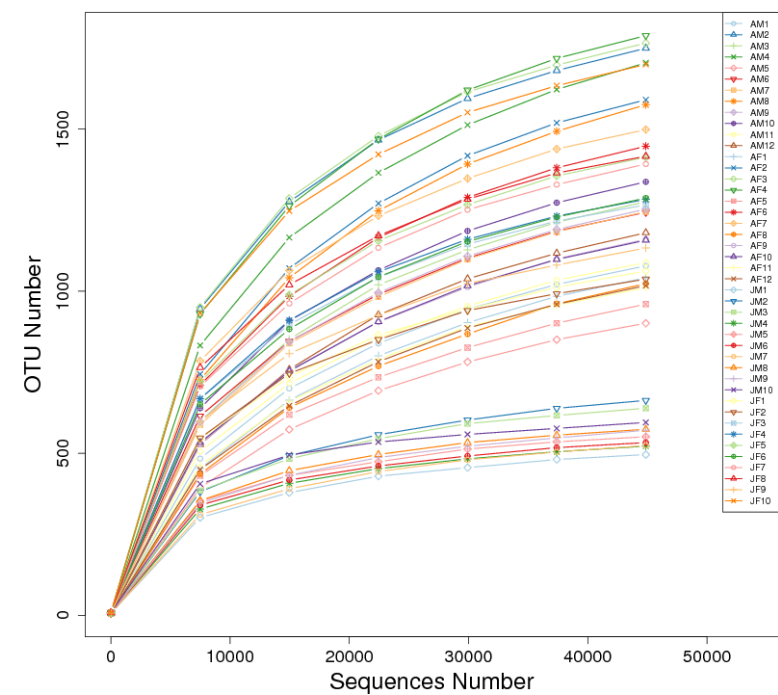

Figure S1. The rarefaction curve for each sample.

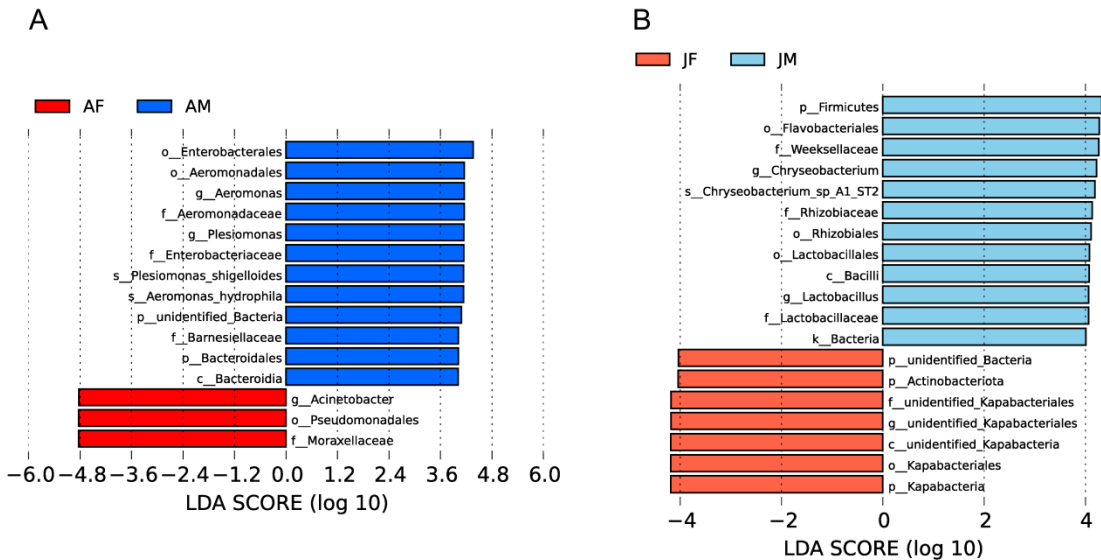

Figure S2. Bacterial taxa with significant sex-biased differences in adult (A) and juvenile (B)

Chinese alligators identified using linear discriminant analysis effect size (LDA > 4,  $p < 0.05$ ).

AM: adult male, AF: adult female, JM: juvenile male, JF: juvenile female.

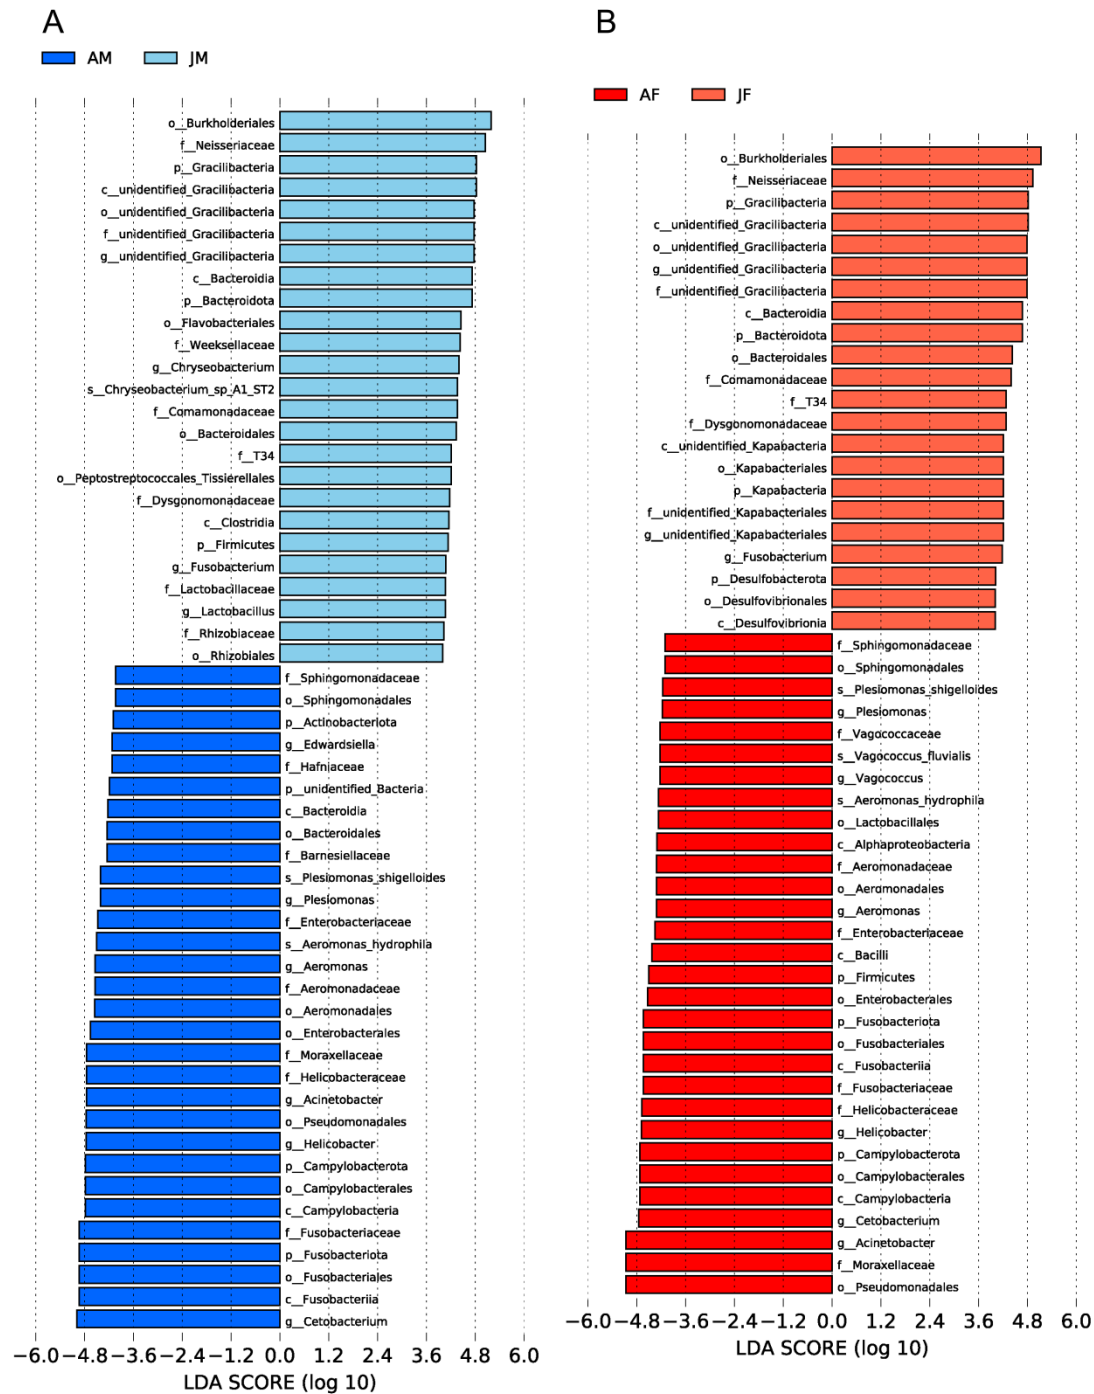

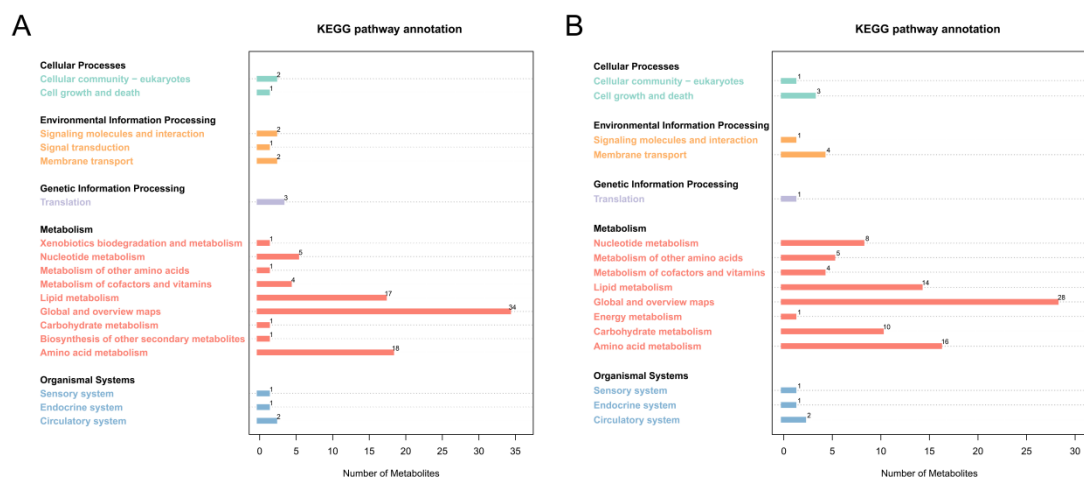

**Figure S4.** Annotation results of metabolites in positive ion mode (A) and negative ion mode (B) in KEGG database.

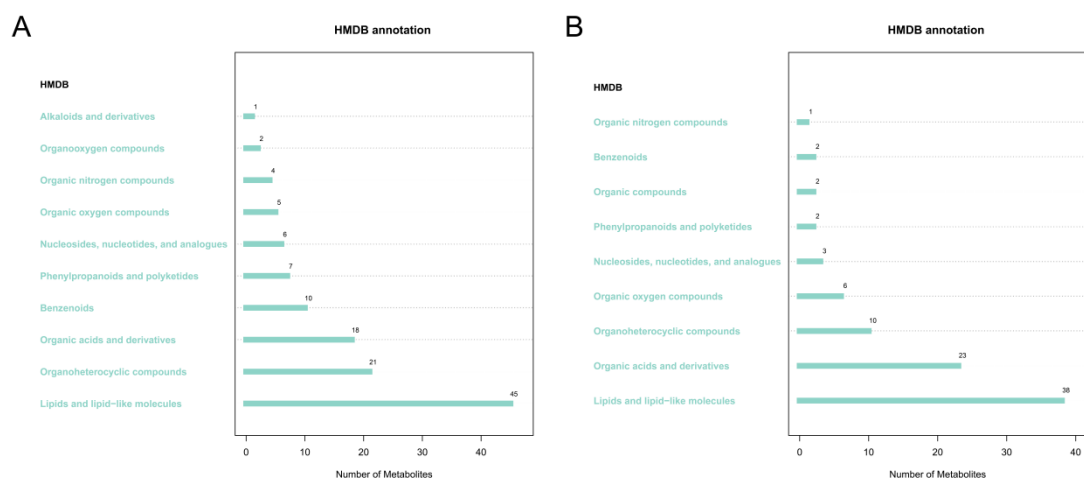

**Figure S5.** Annotation results of metabolites in positive ion mode (A) and negative ion mode (B) in HMDB database.

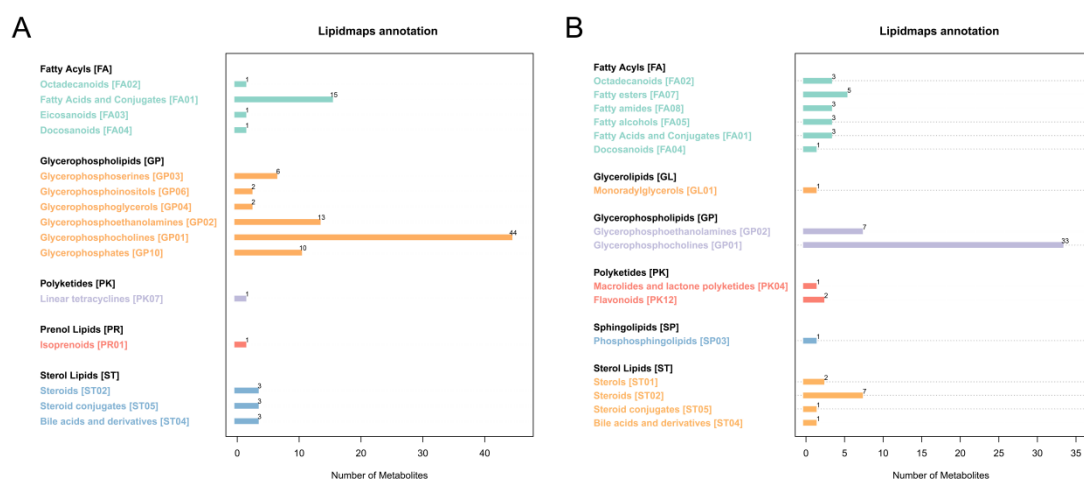

**Figure S6.** Annotation results of metabolites in positive ion mode (A) and negative ion mode (B) in LIPID MAPS database.

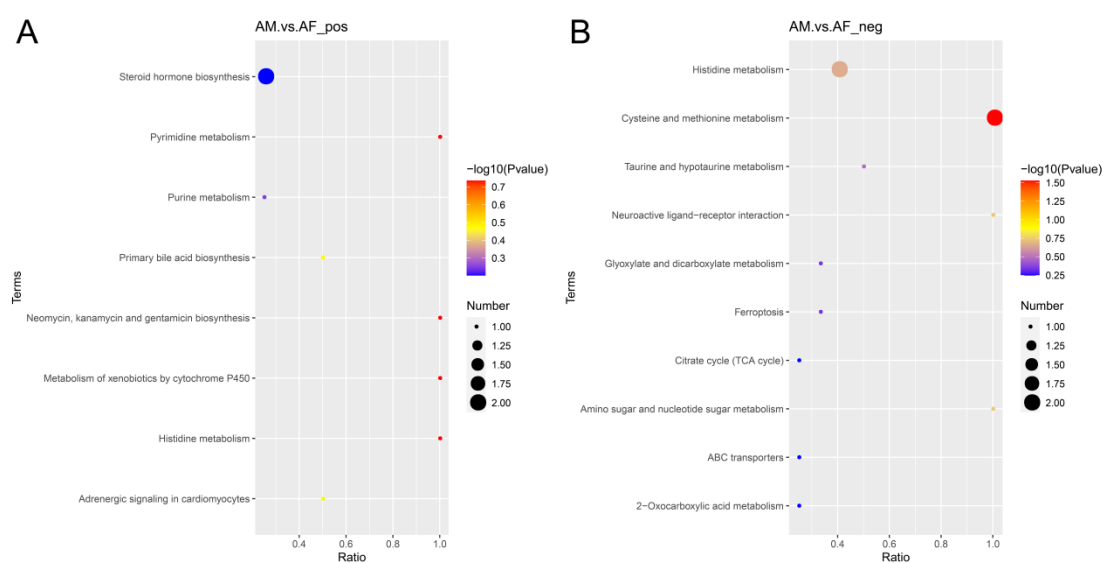

**Figure S7.** Enriched KEGG pathways for sex-biased serum metabolites in positive (A) and negative (B) ion modes.

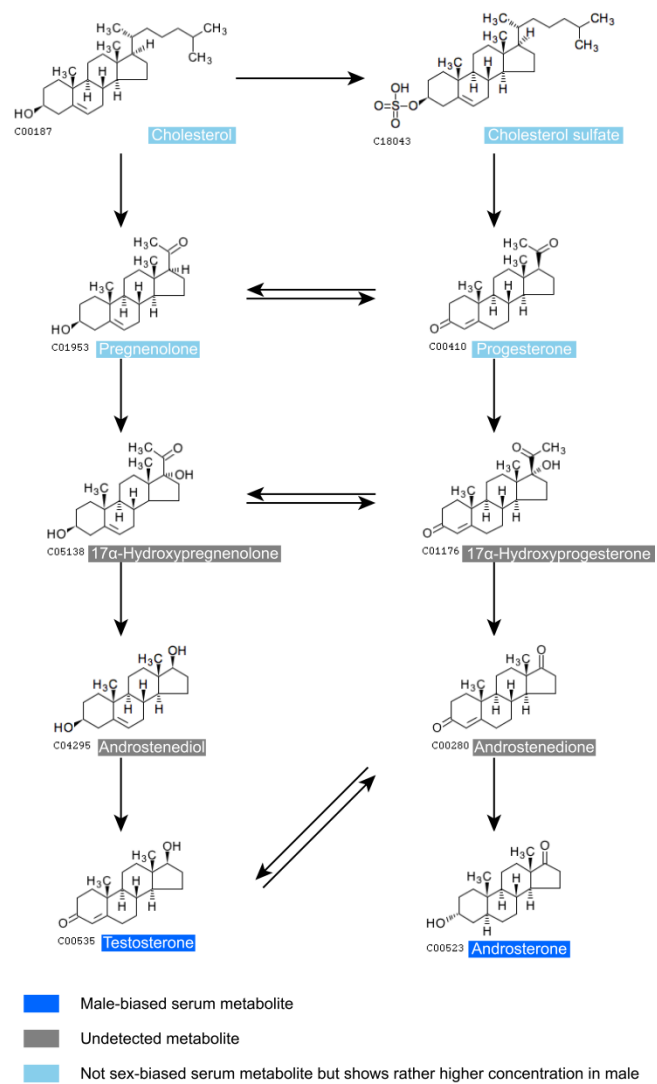

**Figure S8.** Sex-biased patterns of metabolites in the androgenic hormone biosynthesis pathway.
